# Supplementary material
Source: Springer Nature journal article supplement (https://www.springermedizin.de/resource/supplementary/13069_2008_5_MOESM28_ESM.pdf/9659588)

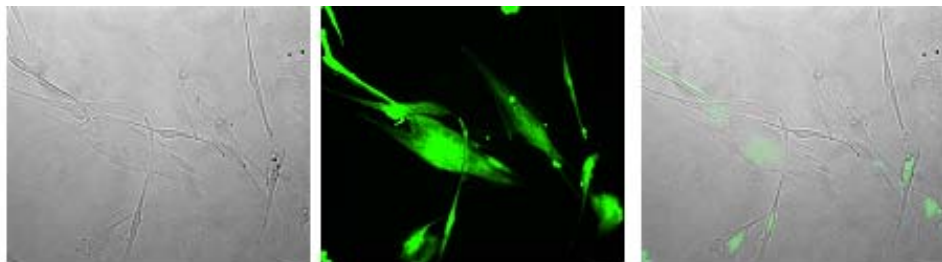

**Control**

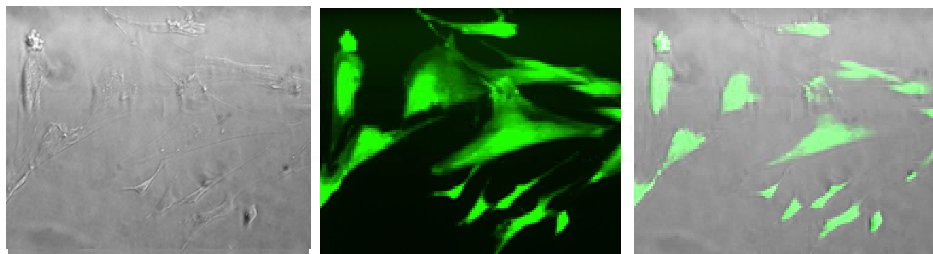

**PDGF-BB**

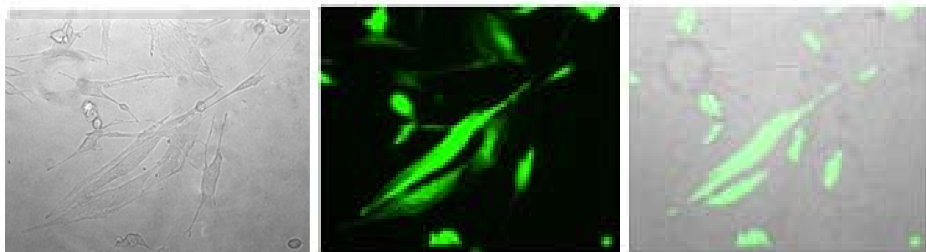

**H<sub>2</sub>O<sub>2</sub> 50 μM**

Supplement: MOESM28 [file 9659588]
